# Supplementary material for: The impact of height-adjustable desks and classroom prompts on classroom sitting time, social, and motivational factors among adolescents
Source: PubMed Central journal article supplement — J Sport Health Sci. 2020 May 20;12(1):97–105. doi: 10.1016/j.jshs.2020.05.002 (PMC9923396; doi:10.1016/j.jshs.2020.05.002), 2020-05-20
Supplement: mmc2.pdf [file mmc2.pdf]

## How to use your sit-stand desks

**HAND LEVER:** Squeeze the **lever** to adjust the height. When changing the height, place your other hand on top for extra control.

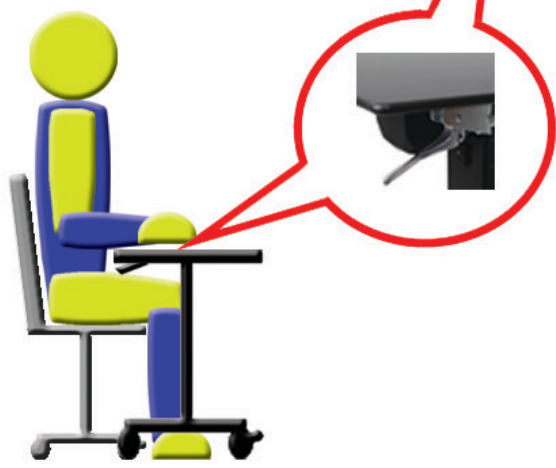

**FOOT BRAKE:** Push the brakes to stop the desk moving. Flick both **brakes** up if you need to move your desk.

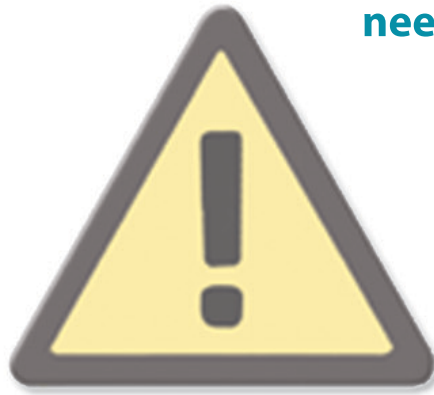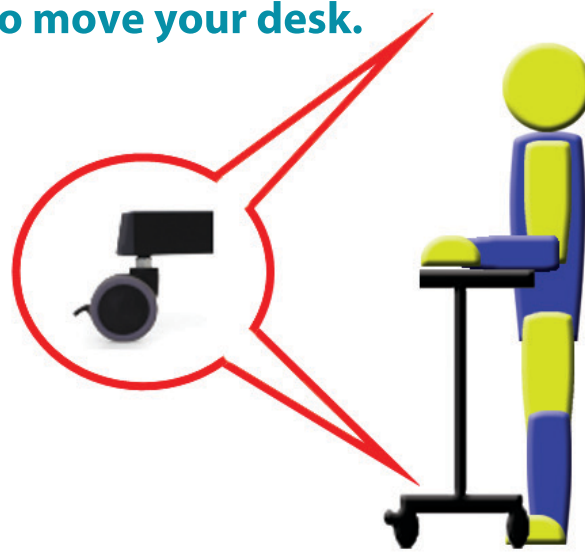

### While Sitting

### While Standing

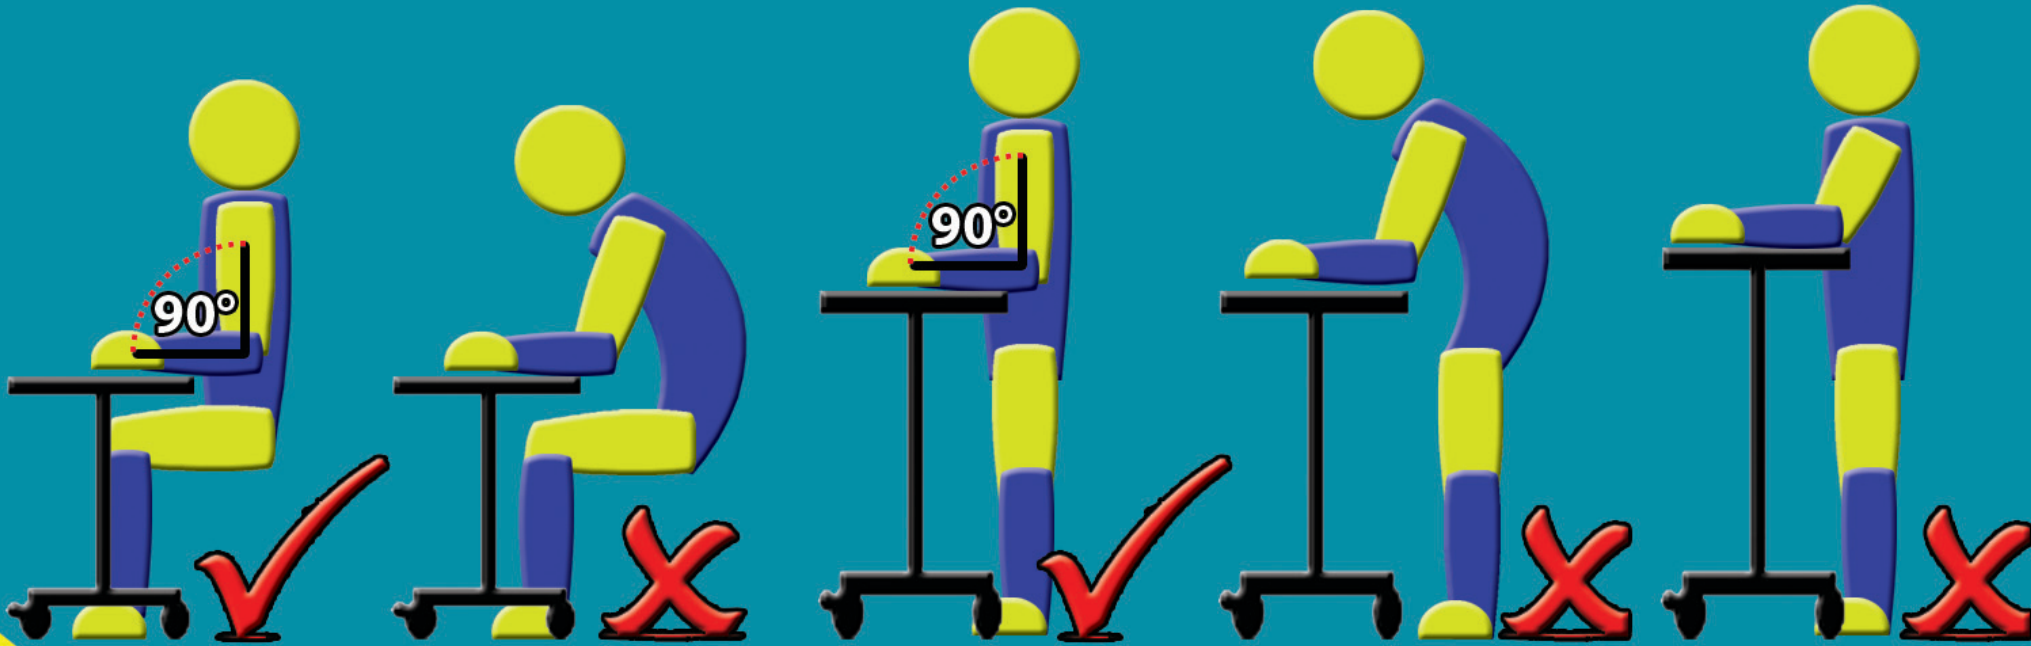

## How to stretch your muscles if you need to

### Important!

Shift the balance between the feet while standing. You can do so by putting one foot on the leg of your desk.

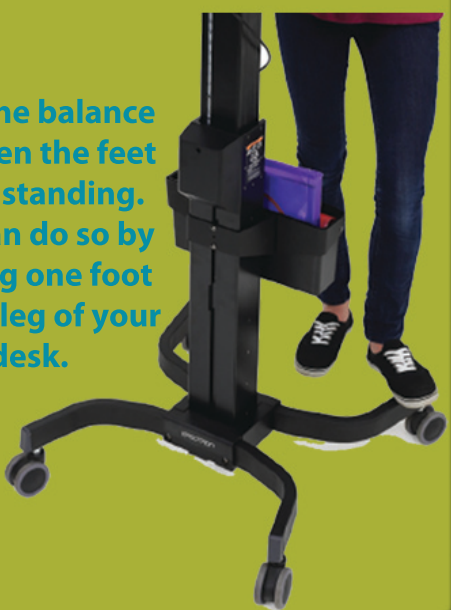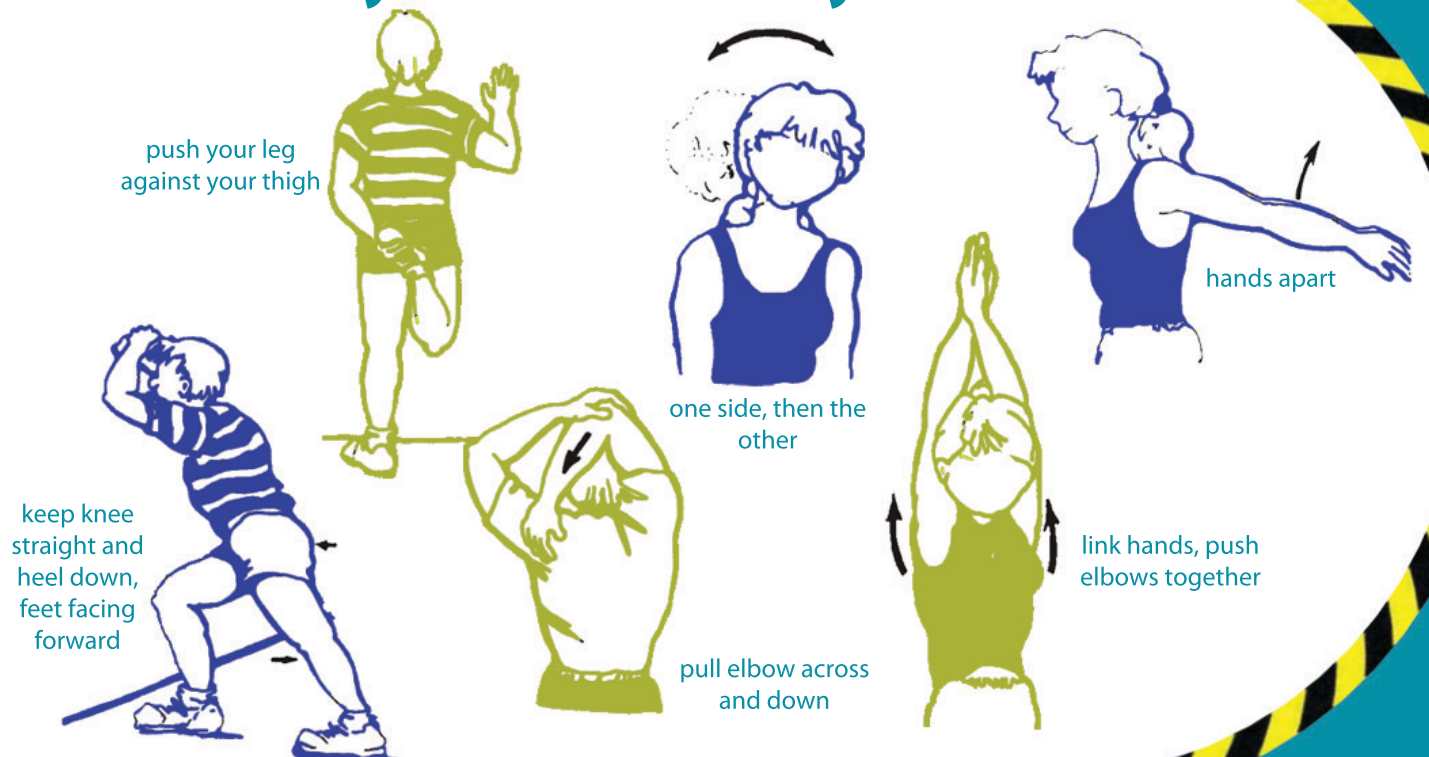



# Why break up sitting?

Helps your brain

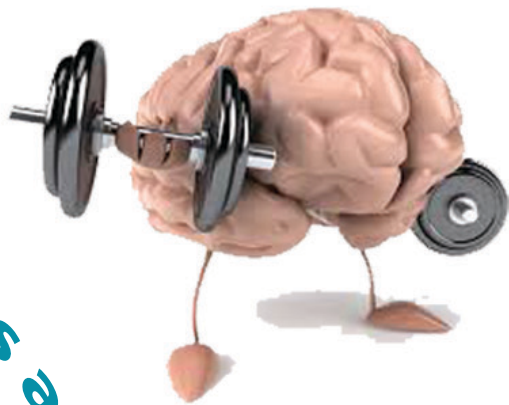

Improves your cardiovascular system

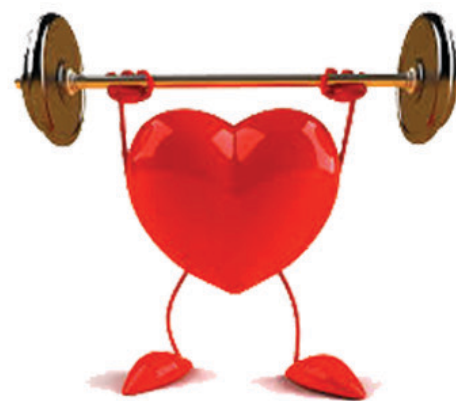

Uses your muscles and improves your posture

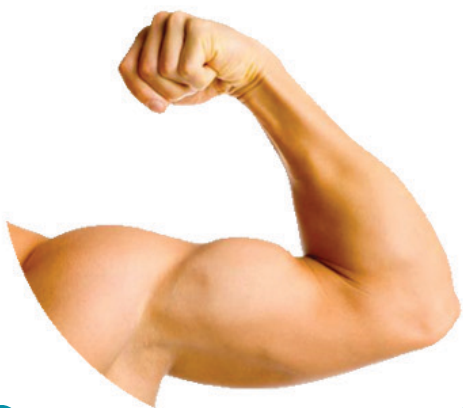

Improves your focus and concentration

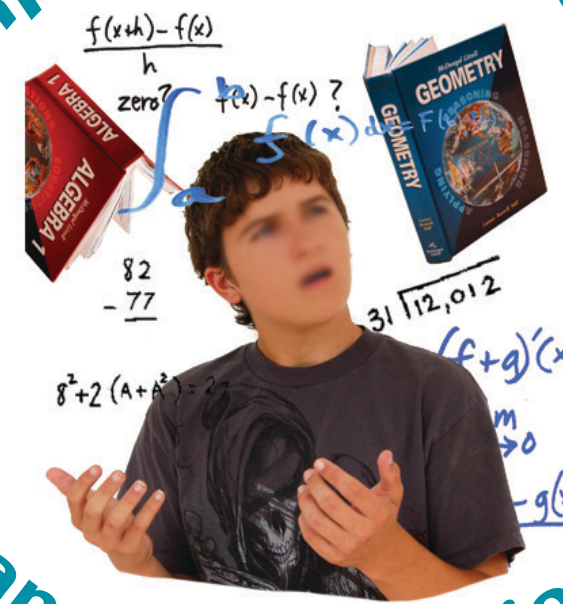

Improves your wellbeing

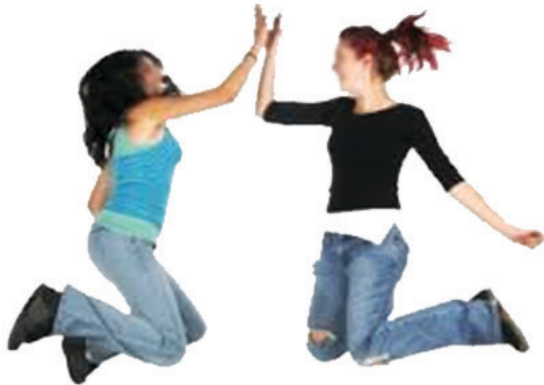

Helps to regulate your body's system

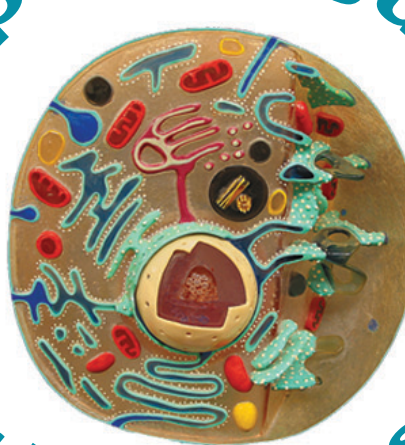

helps with energy balance

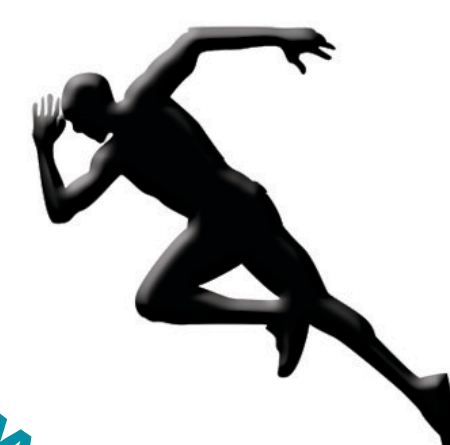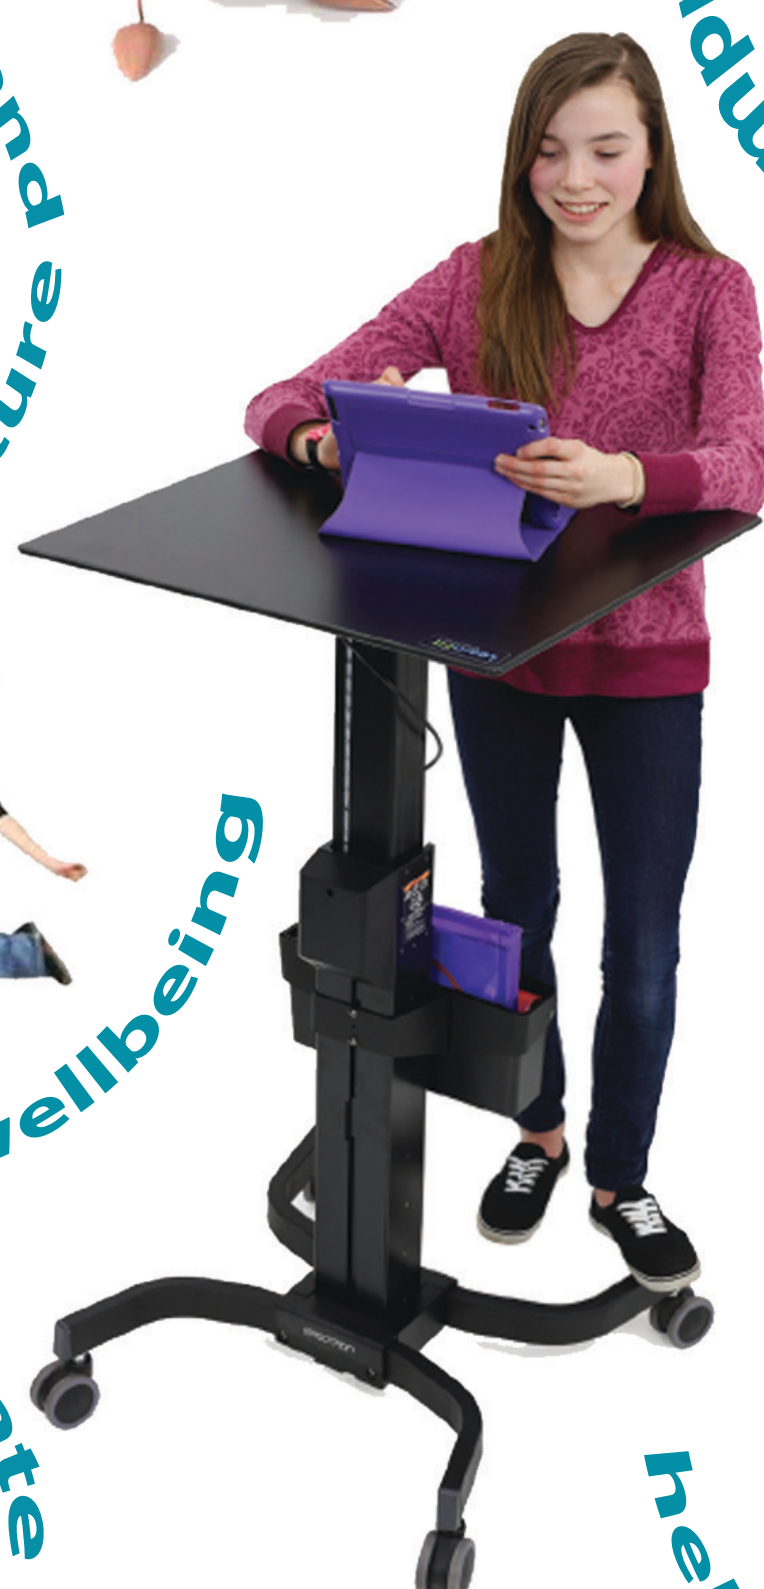



|                                                                                                                                                      |                                                                                                                       |
|------------------------------------------------------------------------------------------------------------------------------------------------------|-----------------------------------------------------------------------------------------------------------------------|
| <p><b>¼ P</b></p> <p><b>SITTING</b></p> <p>CLASSROOM LESSONS</p> <p><b>9<sup>00</sup> AM - 3<sup>30</sup> PM</b></p> <p><b>MON- FRI</b></p> <p>←</p> |  <p><b>MAX. 15 mins</b></p> <p>→</p> |
|------------------------------------------------------------------------------------------------------------------------------------------------------|-----------------------------------------------------------------------------------------------------------------------|

**Break-up** classroom sitting with standing every 15 minutes

**Try and stand** for at least 2 minutes

## Stand up when you are...

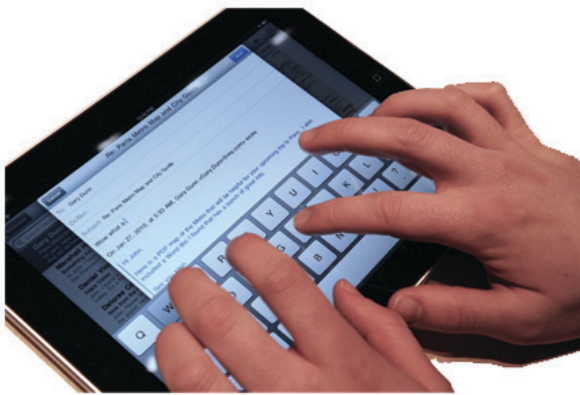

Using your computer or tablet

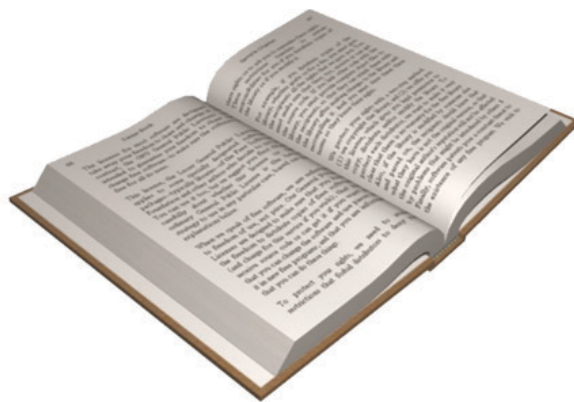

reading

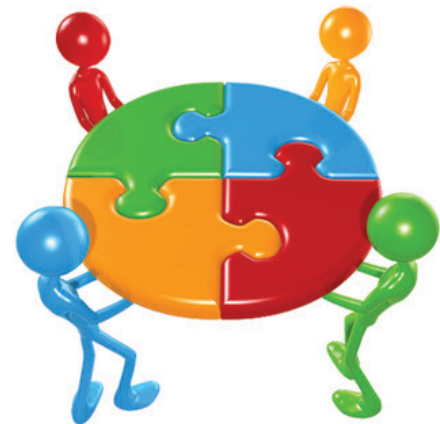

working in a group

*You can also nominate a standing captain*


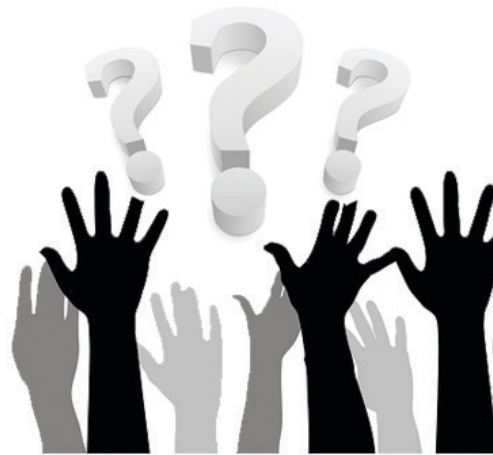

asking questions

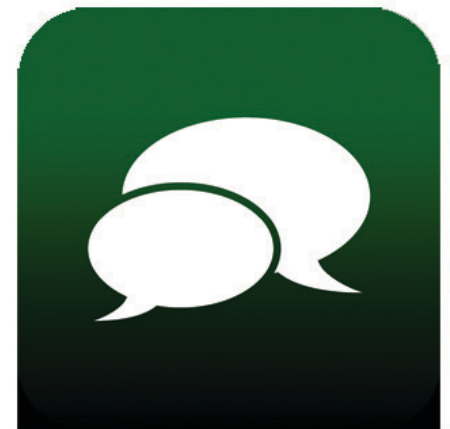

talking

## What other ways can you break-up sitting?

## Desk sticker

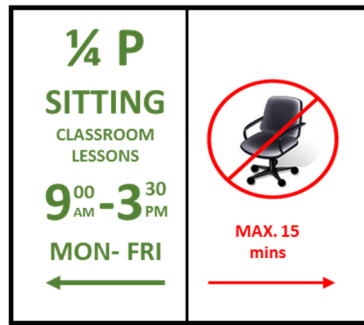

## Height adjustable desk: (Learnfit, Ergotron Inc., Minnesota, USA)

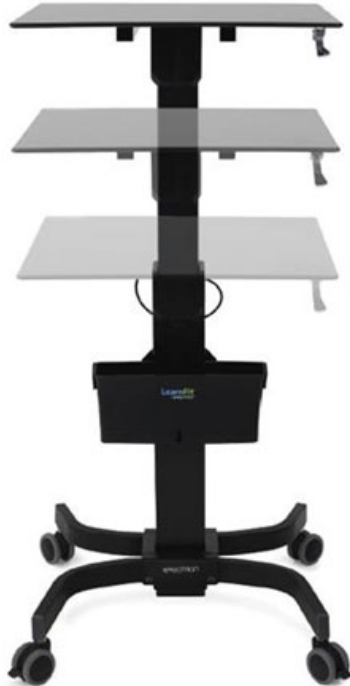

| LearnFit Adjustable Standing Desk |                                                 |
|-----------------------------------|-------------------------------------------------|
| Part #                            | 24-458-200                                      |
| Weight Capacity                   | ≤ 15 lbs (7 kg)                                 |
| Lift                              | 19.6" (50 cm)                                   |
| Worksurface Height                | Minimum 31.8" (81 cm)<br>Maximum 51.4" (131 cm) |
| Worksurface Dimensions            | 24" W X 23" D<br>(61 cm X 58 cm)                |
| Base Footprint                    | 21.9" x 21.3"<br>(56 x 54 cm)                   |
| Shipping Dimensions               | 36.5" x 32.25" x 28.25"<br>(93 x 82 x 72 cm)    |
| Shipping Weight                   | 78 lbs (35 kg)                                  |
| Warranty                          | 5 years                                         |

## Lab stool (Furnware Bodyfurn Lab stool, New Zealand)

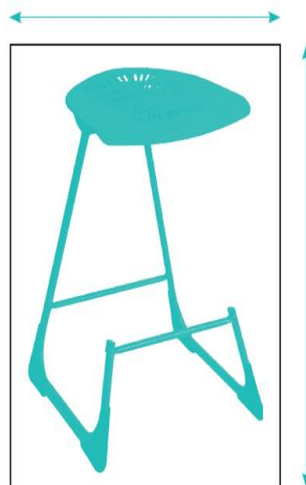

Sizes:  
Small, 460mm high,  
Medium, 560mm high,  
Large, 660mm high

Seat dimensions:  
Medium, 350mm wide x 380mm deep,  
Large, 400mm wide x 440mm deep
